# Supplementary material
Source: MDPI journal article supplement (https://www.mdpi.com/2079-6412/10/2/117)
Supplement: s1 [file s1]

Supplementary Information

# Pure Sn Coatings Produced by Pulse Plating from Stannate Bath

Ashutosh Sharma, Hyungtak Seo \* and Byungmin Ahn \*

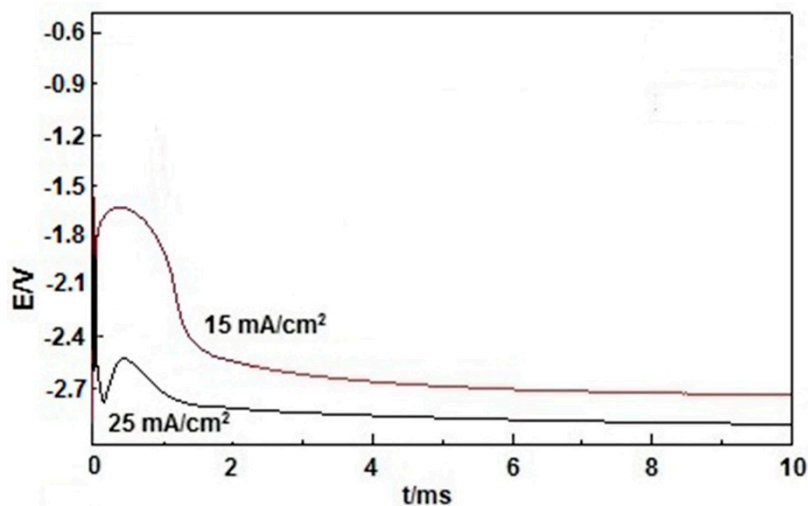

**Figure S1.** The chronopotentiometry curves of Sn recorded in  $\text{Na}_2\text{SnO}_3 + \text{NaOH} + \text{sorbitol}$  electrolyte.
